# Supplementary material
Source: MDPI journal article supplement (https://www.mdpi.com/2073-4441/11/4/644)
Supplement: s1 [file s1]

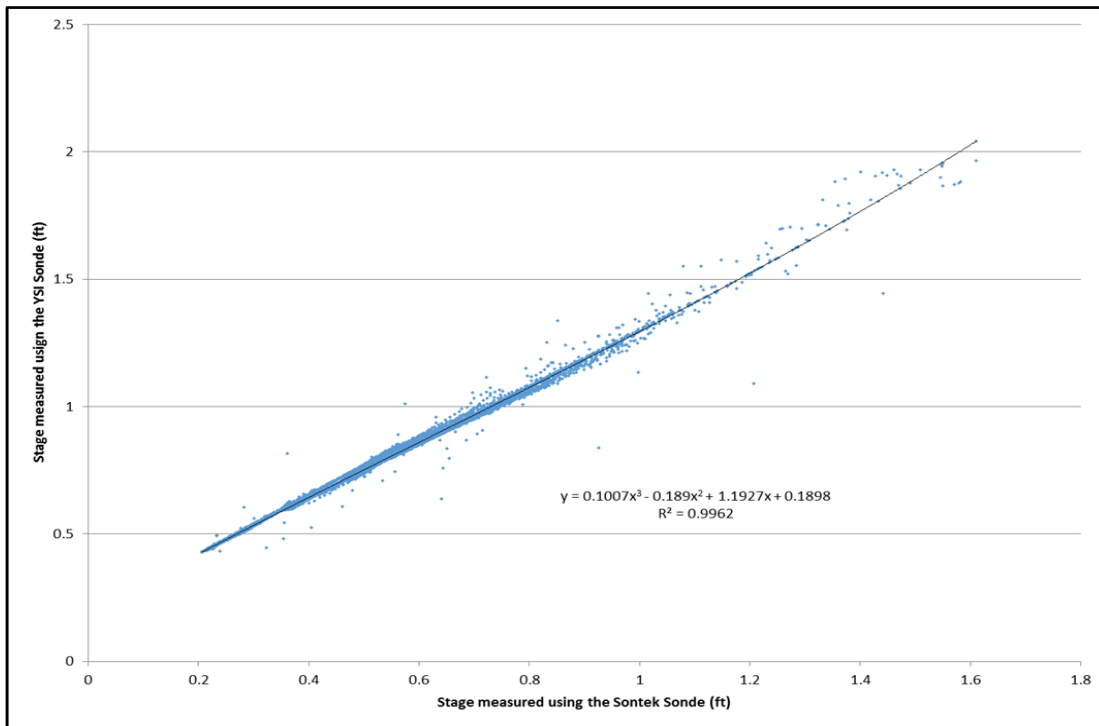

Figure S1. Correlation between depth measured using YSI Sonde and depth measured using the Sontek Sonde

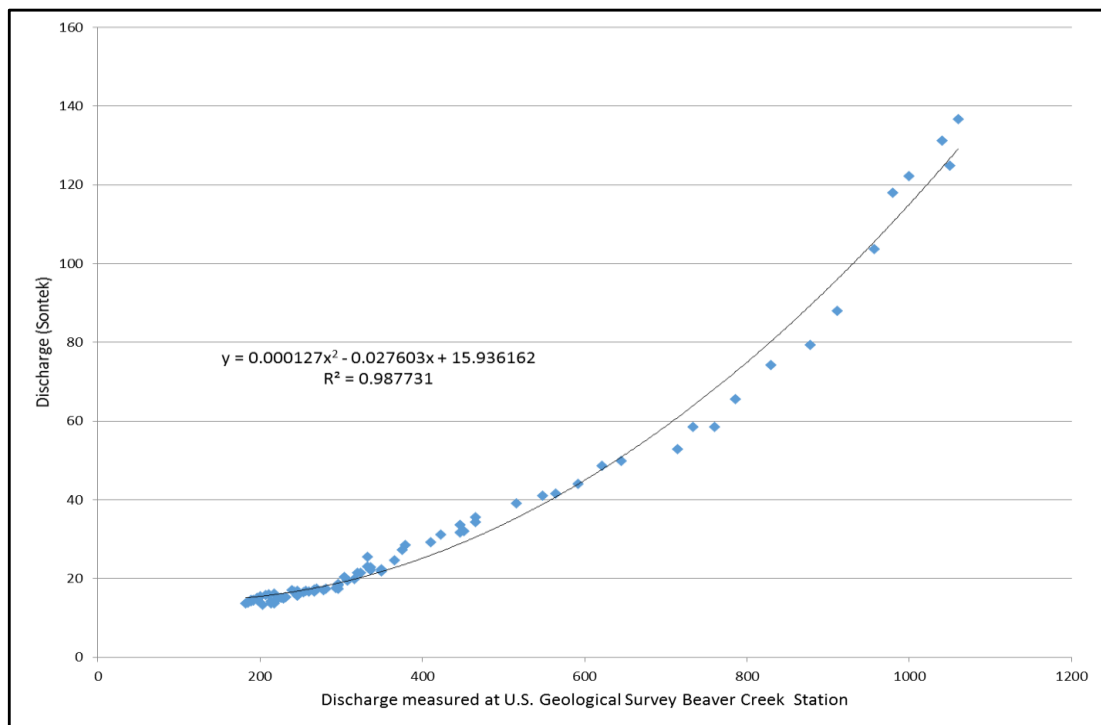

Figure S2. Correlation between discharge measured by USGS and calculated using Sontek Sonde

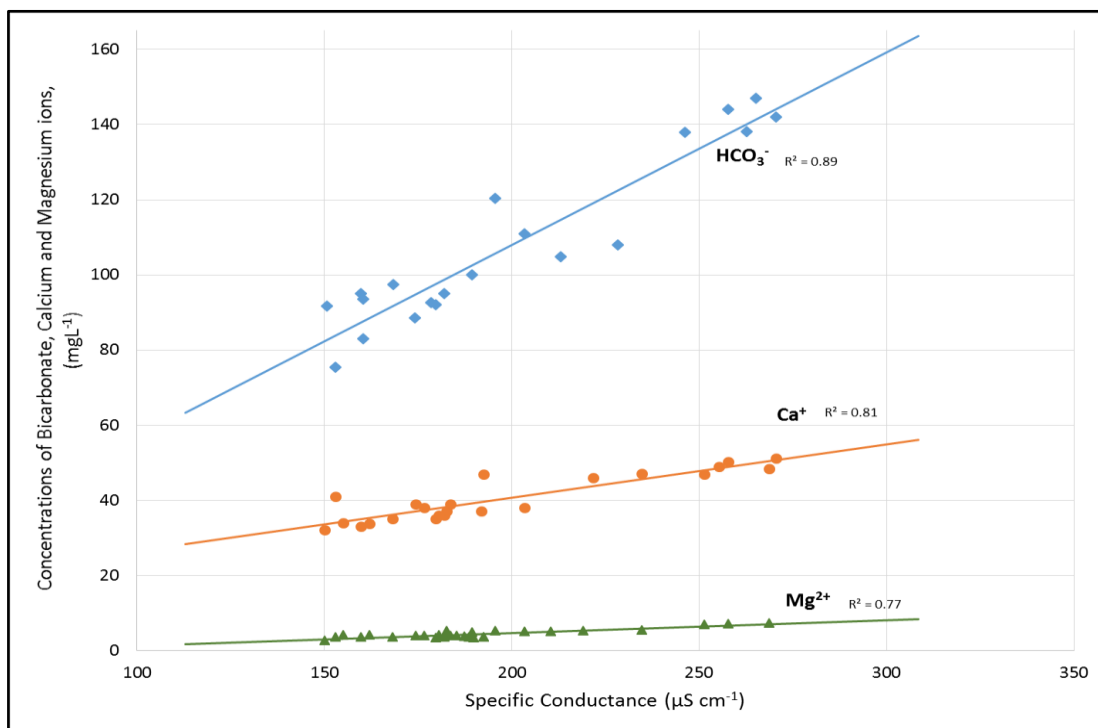

Figure S3. Correlation between concentrations of major cations and specific conductance.

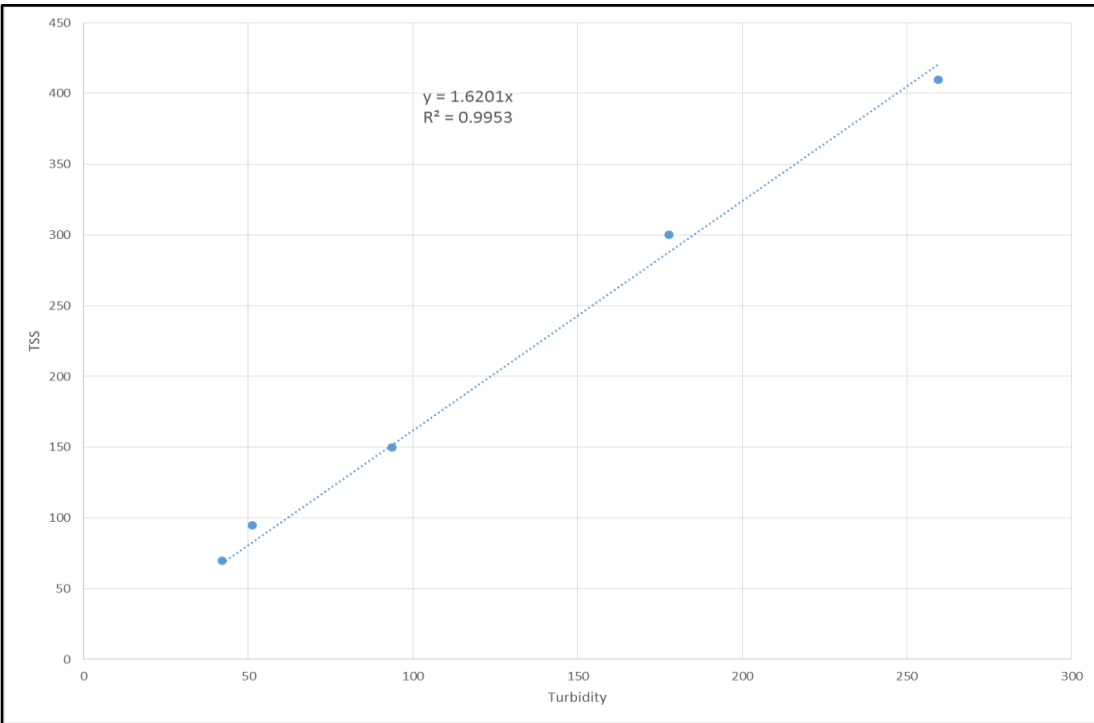

Figure S4. Correlation between TSS and Turbidity

Table S1. Regression statistics for  $\text{Ca}^{2+}$  and SpC,  $\text{Mg}^{2+}$  and SpC, and  $\text{HCO}_3^{-1}$  and SpC

|                                | Standard |       |
|--------------------------------|----------|-------|
| <b>Ca and SpC</b>              | Error    |       |
| R                              | 0.89     |       |
| R Square                       | 0.81     |       |
| Intercept                      | 12       | 3.1   |
| Slope                          | 0.14     | 0.015 |
| <b>Mg and SpC</b>              |          |       |
| R                              | 0.88     |       |
| R Square                       | 0.77     |       |
| Intercept                      | 93       | 11    |
| Slope                          | 23       | 2.4   |
| <b>HCO<sub>3</sub> and Spc</b> |          |       |
| R                              | 0.94     |       |
| R Square                       | 0.89     |       |
| Intercept                      | 13       | 16    |
| Slope                          | 1.7      | 0.14  |
